# Supplementary material for: Suppression of Pro-Inflammatory M1 Polarization of LPS-Stimulated RAW 264.7 Macrophage Cells by Fucoxanthin-Rich Sargassum hemiphyllum
Source: MDPI journal article supplement (doi:10.3390/md21100533), 2023-10-12
Supplement: s1 [file s1]

## Supplementary information

### Supplementary Figure S1.

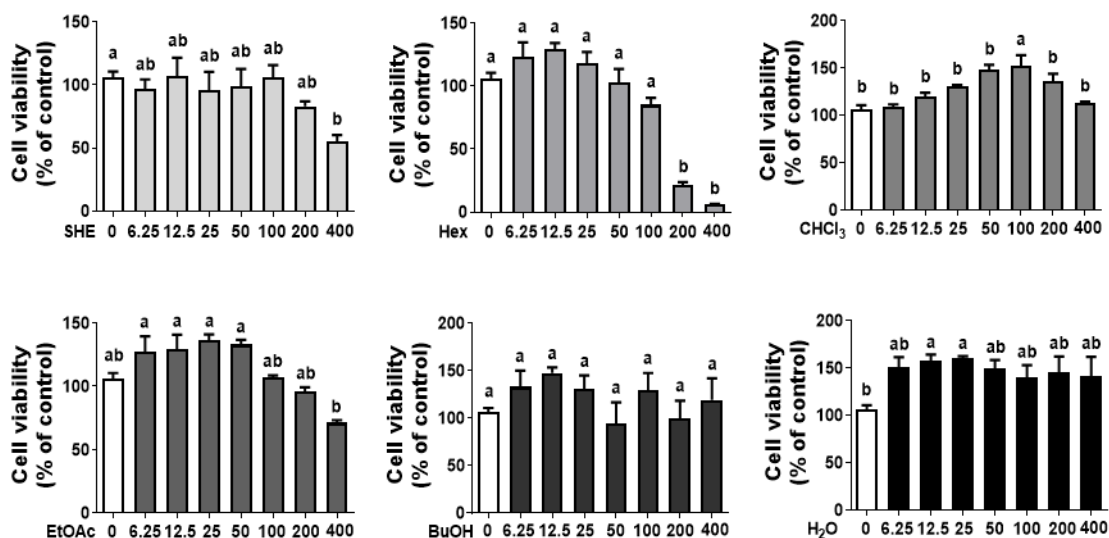

Cytotoxicity of SHE and fractions on RAW 264.7 macrophages. RAW 264.7 cells exposed to the indicated concentrations of SHE and different fractions for 24 h, and cell viability was measured at 570 nm using the MTT assay. Treatment concentrations of each sample were 0, 6.25, 12.5, 25, 50, 100, 200, 400 µg/mL. Different letters on the point indicate a significant difference (p < 0.05)

**Supplementary Table S1.** List of the primers used in the present study.

| Gene          | Forward (5'→3')                    | Reverse (5'→3')                     |
|---------------|------------------------------------|-------------------------------------|
| <i>Rpl32</i>  | CAC CAG TCA GAC CGA TAT            | TTC TCC GCA CCC TGT TG              |
| <i>Tnf</i>    | GGC TGC CCC GAC TAC GT             | ACT TTC TCC TGG TAT GAG ATA GCA AAT |
| <i>Il1b</i>   | GTC ACA AGA AAC CAT GGC ACA T      | GCC CAT CAG AGG CAA GGA             |
| <i>Il6</i>    | CCC ACC AAG AAC GAT AGT CA         | CTC CGA CTT GTG AAG TGG TA          |
| <i>Cox2</i>   | GCC TAC TAC AAG TGT TTC TTT TTG CA | CAT TTT GTT TGA TTG TTC ACA CCA T   |
| <i>Nos2</i>   | AAT CTT GGA GCG AGT TGT GG         | CAG GAA GTA GGT GAG GGC TTG         |
| <i>Cd86</i>   | ACG ATG GAC CCC AGA TGC ACC A      | GCG TCT CCA CGG AAA CAG CA          |
| <i>Ccl2</i>   | GGC AGA GAA GCA TGG CCC AGA A      | CTT CTG GGC CTG CTG TTC A           |
| <i>Cat</i>    | CAC ACA CAC ACA CAT GCA ATA C      | TTC TGA GTG GGC CAT CTT TAT C       |
| <i>Sod1</i>   | GAG ACC TGG GCA ATG TGA T          | GTT TAC TGC GCA ATC CCA CT          |
| <i>Nfe2l2</i> | CTC GCT GGA AAA AGA AGT G          | CCG TCC AGG AGT TCA GAG G           |
| <i>Gpx1</i>   | GTC CAC CGT GTA TGC CTT CT         | TCT GCA GAT CGT TCA TCT CG          |
| <i>Nox1</i>   | TTC ACA GTT ATT CAT ATC ATT GC     | AGA GAA CAG AAG CGA GAG             |
| <i>Cybb</i>   | CCC TTT GGT ACA GCC AGT GAA GAT    | CAA TCC CGG CTC CCA CTA ACA TCA     |
| <i>Hmox1</i>  | CTC TCT TCT CTT GGG CCT CTA A      | TGT CAG GTA TCT CCC TCC ATT C       |

<sup>1</sup> Abbreviations used: Rpl32, Ribosomal protein L32; Tnf, Tumor necrosis factor- $\alpha$ ; Il1b, Interleukin-1 $\beta$ ; Il6, Interleukin 6; Cox2, Cyclooxygenases2; Nos2, inducible nitric oxide synthase; Cd86, Cluster of Differentiation 86; Ccl2, chemokine (C-C motif) ligand 2; Cat, Catalase; Sod1, Superoxide dismutase 1; Nfe2l2, Nuclear factor erythroid-2-related factor 2; Gpx1, Glutathione Peroxidase 1; Nox1, NADPH oxidase 1; Cybb, Cytochrome b-245 beta polypeptide isoform 1; Hmox1, Heme Oxygenase 1.
